# Supplementary material for: Molecular Characterization of Anopheles algeriensis Theobald, 1903 (Diptera: Culicidae) Populations from Europe
Source: MDPI journal article supplement (doi:10.3390/pathogens11090990), 2022-08-30
Supplement: s1 [file s1]

Supplementary File S1: Information on the three algorithms used for species delimitation.

### **ABGD**

COI\_distances:

Pmin=0.001

Pmax=0.1

Steps=10

X=3

distance=K80, TS/TV=2.0

Nb bins=39

COI\_results:

Nb seq:92 \*/

Partition 1 : found 23 groups (prior maximal distance P= 0.001000)

Partition 2 : found 23 groups (prior maximal distance P= 0.001668)

Partition 3 : found 8 groups (prior maximal distance P= 0.002783)

Partition 4 : found 3 groups (prior maximal distance P= 0.004642)

Partition 5 : found 3 groups (prior maximal distance P= 0.007743)

Partition 6 : found 3 groups (prior maximal distance P= 0.012915)

-----  
ITS2\_distances:

Pmin=0.001

Pmax=0.1

Steps=7

X=2

distance=K80, TS/TV=2.0

Nb bins=10

ITS2\_results:

Nb seq:33 \*/

Partition 1 : found 2 groups (prior maximal distance P= 0.001000)

Partition 2 : found 2 groups (prior maximal distance P= 0.002154)

Partition 3 : found 2 groups (prior maximal distance P= 0.004642)

Partition 4 : found 2 groups (prior maximal distance P= 0.010000)

Partition 5 : found 2 groups (prior maximal distance P= 0.021544)

### **GYMC**

method: single

likelihood of null model: 810.3946

maximum likelihood of GMYC model: 815.6901

likelihood ratio: 10.59099

result of LR test: 0.005014135\*\*

number of ML clusters: 3

confidence interval: 1-15

number of ML entities: 5

confidence interval: 3-22

threshold time: -0.0167607

### **mPTP**

COI results:

Command: ../bin/mptp mptp --ml --multi --outgroup FN395171,JX255708 --outgroup\_crop --  
svg\_fontsize 13 --tree\_file ../uploads/hhib50q6ikaju10b9oc9hk2h22.newick --  
output\_file ../uploads/hhib50q6ikaju10b9oc9hk2h22.1  
Number of edges greater than minimum branch length: 58 / 182  
Null-model score: 269.946667  
Best score for multi coalescent rate: 269.946667  
Number of delimited species: 3

Species 1:

KU214669\_Romania  
KU214670\_Romania  
KU214668\_Romania  
KU214667\_Romania  
KU214666\_Romania  
KU214665\_Romania  
ON849143\_Italy  
ON849137\_Italy  
ON849130\_Italy  
ON849122\_Italy  
MG808421\_Germany  
MG808415\_Germany  
MG808414\_Germany  
KP942711\_Sweden  
MG808417\_Germany  
MG808420\_Germany  
MG808416\_Germany  
MG808418\_Germany  
ON849154\_Italy  
ON849155\_Italy  
ON849150\_Italy  
KT876491\_Romania  
KU214675\_Romania  
ON849136\_Italy  
ON849142\_Italy  
ON849147\_Italy  
ON849156\_Italy  
ON849131\_Italy  
ON849135\_Italy  
ON849144\_Italy  
ON949134\_Italy  
MG808419\_Germany  
KP942712\_Sweden  
KT876467\_Romania  
ON849157\_Italy  
ON849159\_Italy  
ON849160\_Italy  
ON849138\_Italy  
ON849127\_Italy  
KU214671\_Romania  
KU214672\_Romania  
KT876482\_Romania  
ON849161\_Italy

ON949126\_Italy  
ON849164\_Italy  
ON849124\_Italy  
ON849152\_Italy  
ON849123\_Italy  
ON849128\_Italy  
ON849132\_Italy  
ON849162\_Italy  
ON849163\_Italy  
ON849129\_Italy  
ON849149\_Italy  
ON849125\_Italy  
ON849133\_Italy  
ON849139\_Italy  
ON849140\_Italy  
ON849141\_Italy  
ON849145\_Italy  
ON849146\_Italy  
ON849148\_Italy  
ON849153\_Italy  
ON849158\_Italy  
ON849151\_Italy

Species 2:

ON854129\_Romania  
KU214673\_Romania  
KU214674\_Romania

Species 3:

MW961332\_Portugal  
MT192975\_Spain  
MH370026\_Spain  
MK402706\_Spain  
MK402795\_Spain  
MK402859\_Spain  
MH370027\_Spain  
MK402731\_Spain  
MK402857\_Spain  
MT192981\_Spain  
MK402711\_Spain  
MK402741\_Spain  
MH348260\_Spain  
MH370024\_Spain  
MK402705\_Spain  
MK402715\_Spain  
MK402770\_Spain  
MK402812\_Spain  
MK402833\_Spain  
MK402842\_Spain  
MK402867\_Spain  
MT192980\_Spain  
MW961330\_Portugal  
MW961331\_Portugal

ITS2 results:

Command: ../bin/mptp mptp --ml --multi --outgroup AY515163 --outgroup\_crop --  
tree\_file ../uploads/h10tkd822rn5jj767npvoi9um0.newick --  
output\_file ../uploads/h10tkd822rn5jj767npvoi9um0.1  
Number of edges greater than minimum branch length: 2 / 64  
Null-model score: 6.950537  
Best score for multi coalescent rate: 6.950537  
Number of delimited species: 1

Species 1:

ON862628\_Sweden  
ON862628\_Sweden  
ON862627\_Sweden  
ON862626\_Sweden  
ON862622\_Romania  
ON862621\_Romania  
ON862620\_Romania  
ON862619\_Romania  
ON862618\_Romania  
ON862617\_Romania  
ON862616\_Romania  
ON862615\_Romania  
ON853613 Italy Policoro (1)  
ON853612 Italy Pisticci (15)  
ON853610 Italy Menfredonia (17)  
ON853609 Italy Lesina (48)  
ON862645-ON862653 Germany (9)  
ON862654-ON862663 Germany (10)  
ON862631-ON862644 Germany (14)  
ON853611 Italy Castellaneta (2)  
MK412727\_Spain  
MK412728\_Spain  
MK412729\_Spain  
MK412730\_Spain  
MK412732\_Spain  
MK412734\_Spain  
MK412741\_Spain  
MK412745\_Spain  
MK412751\_Spain  
MK412753\_Spain  
MK412757\_Spain  
MK412758\_Spain  
MK412760\_Spain
