# Supplementary material for: Molecular Characterization of Anopheles algeriensis Theobald, 1903 (Diptera: Culicidae) Populations from Europe
Source: MDPI journal article supplement (doi:10.3390/pathogens11090990), 2022-08-30

Figure S1. Cluster analysis of partial COI gene sequences, representing European populations of *Anopheles algeriensis*, based on Maximun Likelihood method. The tree was built using the T92+G model and rooted with *An. superpictus* and *Culex pipiens molestus*. Statistical support of taxa clustering was assessed by 1000 bootstrap iterations and support values  $\geq 70\%$  are displayed at tree nodes. Tree scale indicates the amount of genetic divergence in substitution per site.\*Original sequences obtained in the present study.

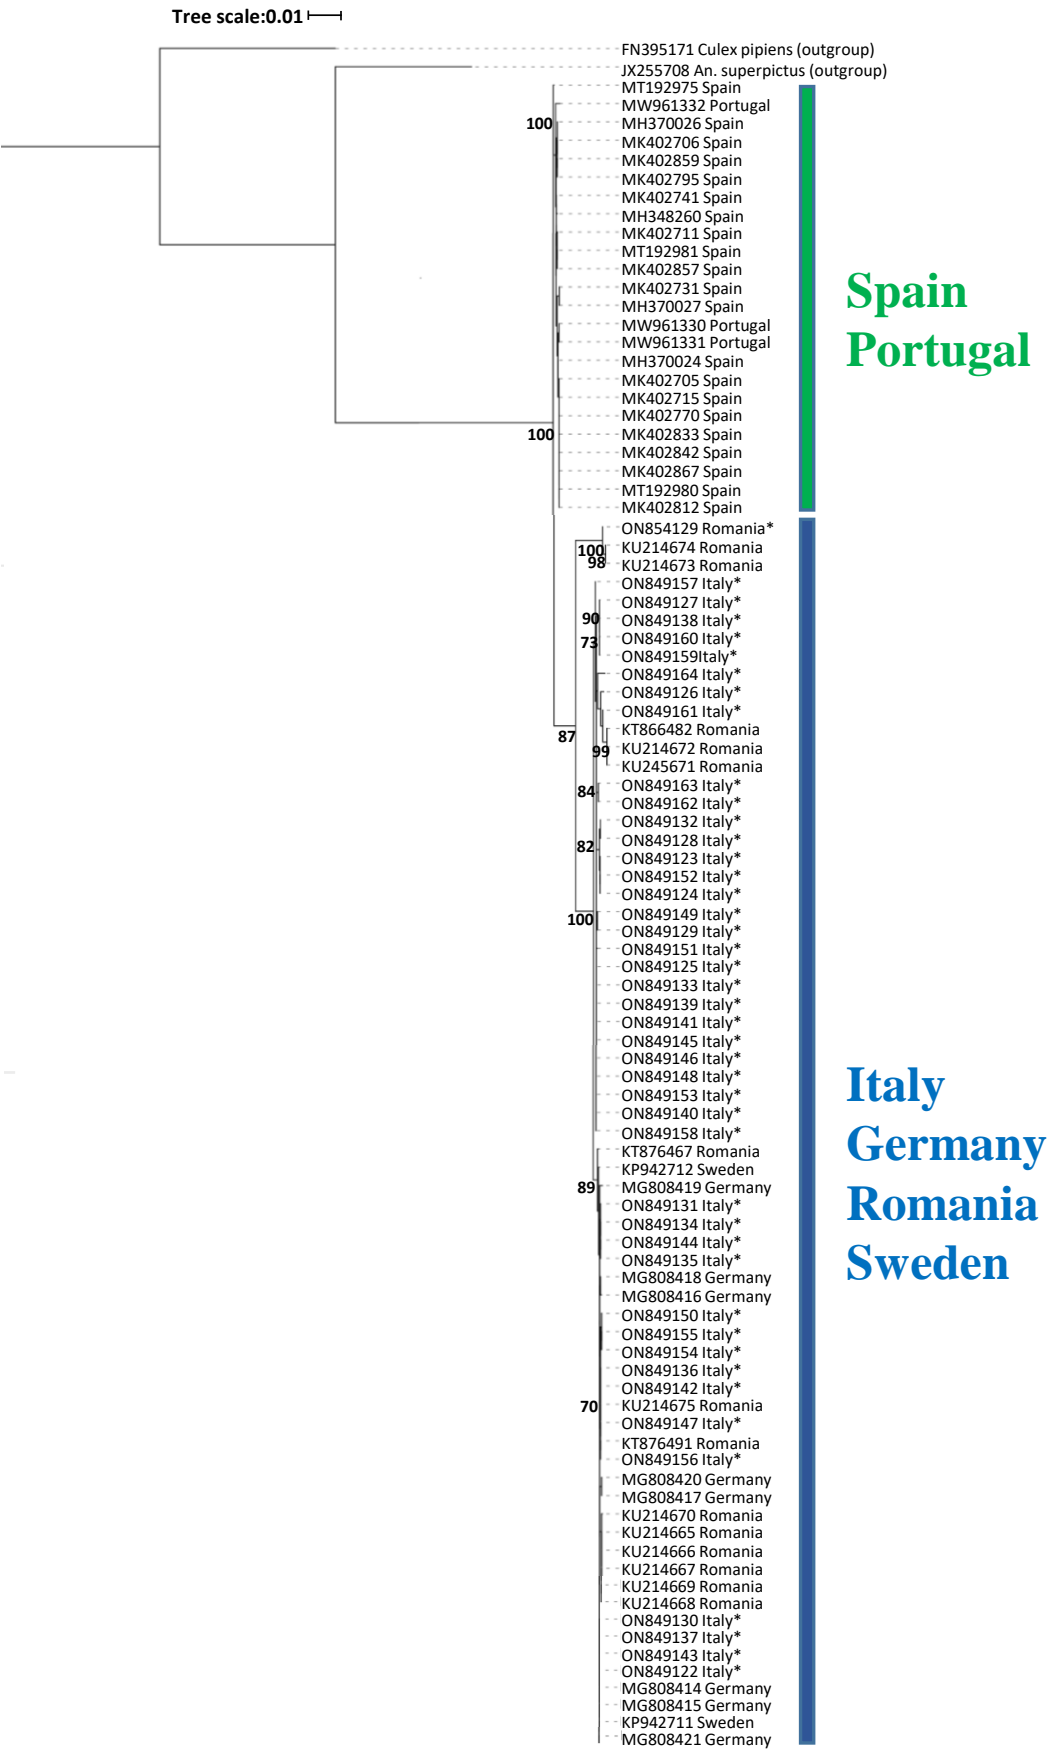

Supplement: s1 [file s1]
