# Supplementary material for: Molecular Characterization of Anopheles algeriensis Theobald, 1903 (Diptera: Culicidae) Populations from Europe
Source: MDPI journal article supplement (doi:10.3390/pathogens11090990), 2022-08-30
Supplement: s1 [file s1]

Table S2. List of additional COI and ITS2 sequences, retrieved from GenBank, used as comparison in the present study.

| Country  | Locality                     | No. specimens | COI<br>Genbank Accession No.                                                                                                                                                                                                                    |
|----------|------------------------------|---------------|-------------------------------------------------------------------------------------------------------------------------------------------------------------------------------------------------------------------------------------------------|
| Germany  | Klein Behnitz; Wustrow       | 8             | MG808414 to MG808421                                                                                                                                                                                                                            |
| Portugal | Santiago do Cacém            | 3             | MW961330 to MW961332                                                                                                                                                                                                                            |
| Romania  | Danube Delta                 | 14            | KU214665 to KU214675<br>KT876467<br>KT876482<br>KT876491                                                                                                                                                                                        |
| Spain    | Navarra; La Roja; Maiorca    | 21            | MK402705-MK402706<br>MK402711<br>MK402715<br>MK402731<br>MK402741<br>MK402770<br>MK402795<br>MK402812<br>MK402833<br>MK402842<br>MK402857<br>MK402859<br>MK402867<br>MH370024<br>MH370026-MH370027<br>MT192975<br>MT192980-MT192981<br>MH348260 |
| Sweden   | Gotland                      | 2             | KP942711-KP942712                                                                                                                                                                                                                               |
| Country  |                              | No. specimens | ITS2<br>GenBank Accession No.                                                                                                                                                                                                                   |
| Spain    | Navarra; La Roja             | 13            | MK412727 to MK412730<br>MK412732<br>MK412734<br>MK412741<br>MK412745<br>MK412751<br>MK412753<br>MK412757-MK412758<br>MK412760                                                                                                                   |
| Outgroup | Species                      |               | GenBank Accession No.                                                                                                                                                                                                                           |
| ITS2     | <i>Anopheles superpictus</i> |               | AY515163                                                                                                                                                                                                                                        |
| COI      | <i>Anopheles superpictus</i> |               | JX255708                                                                                                                                                                                                                                        |
|          | <i>Culex pipiens</i>         |               | FN395171                                                                                                                                                                                                                                        |
