# Supplementary material for: Molecular Characterization of Anopheles algeriensis Theobald, 1903 (Diptera: Culicidae) Populations from Europe
Source: MDPI journal article supplement (doi:10.3390/pathogens11090990), 2022-08-30
Supplement: s1 [file s1]

Table S1. List of *Anopheles algeriensis* specimens analyzed in the present study.

| Country                 | Collection site                                 | Collection Year | No. Specimens analysed for ITS2 | GenBank ITS2 Acc. Num. | No. Specimens analysed for COI | GenBank COI Acc. Num. |
|-------------------------|-------------------------------------------------|-----------------|---------------------------------|------------------------|--------------------------------|-----------------------|
| Italy<br>(No. Tot 83)   | Lesina (Foggia),<br>Apulia                      | 2020            | 48                              | ON853609*              | 39                             | ON849122-<br>ON849160 |
|                         | Manfredonia (Foggia),<br>Apulia                 | 2020            | 17                              | ON853610*              | 1                              | ON849161              |
|                         | Castellaneta (Taranto,<br>Apulia                | 2021            | 2                               | ON853611*              | 2                              | ON849163-<br>ON849164 |
|                         | Pisticci (Matera).<br>Basilicata                | 2021            | 15                              | ON853612*              | 1                              | ON849162              |
|                         | Policoro (Matera),<br>Basilicata                | 2021            | 1                               | ON853613*              | ---                            | ---                   |
| Germany (No.<br>Tot 33) | Klein Behnitz,<br>Brandenburg                   | 2016            | 14                              | ON862631-ON862644      | ---                            | ---                   |
|                         | Wustrow,<br>Mecklenburg-Western Pomerania       | 2017            | 9                               | ON862645-ON862653      | ---                            | ---                   |
|                         | Wustrow,<br>Mecklenburg-Western Pomerania       | 2015            | 10                              | ON862654-ON862663      | ---                            | ---                   |
| Romania (No.<br>Tot 8)  | Sulina, Danube<br>Delta Biosphere Reserve       | 2014            | 5                               | ON862615-ON862619      | ---                            | ---                   |
|                         | Sulina, Danube<br>Delta Biosphere Reserve       | 2015            | 1                               | ON862620               | ---                            | ---                   |
|                         | Lake Rosulet,<br>Danube Delta Biosphere Reserve | 2015            | 1                               | ON862621               | 1                              | ON854129              |
|                         | Lake Rosulet,<br>Danube Delta Biosphere Reserve | 2016            | 1                               | ON862622               | ---                            | ---                   |
| Sweden                  | Gotland                                         | 2013            | 4                               | ON862626-ON862629      | ---                            | ---                   |

\* One representative ITS2 sequence for each Italian collection site was submitted in GenBank.
