# Supplementary material for: Molecular Characterization of Anopheles algeriensis Theobald, 1903 (Diptera: Culicidae) Populations from Europe
Source: MDPI journal article supplement (doi:10.3390/pathogens11090990), 2022-08-30

Figure S2. Sequence alignment of the ITS2 of *Anopheles algeriensis*. The five sequences shown in the alignment are representative of the *Anopheles algeriensis* samples examined for each geographic area. The colored nucleotides indicate the position of single nucleotide polymorphisms. Red asterisks positioned in correspondence with the dash (-) highlight the position of insertions or deletions in the alignment. Start end of the presumptive ITS2 region are indicated by red arrows.

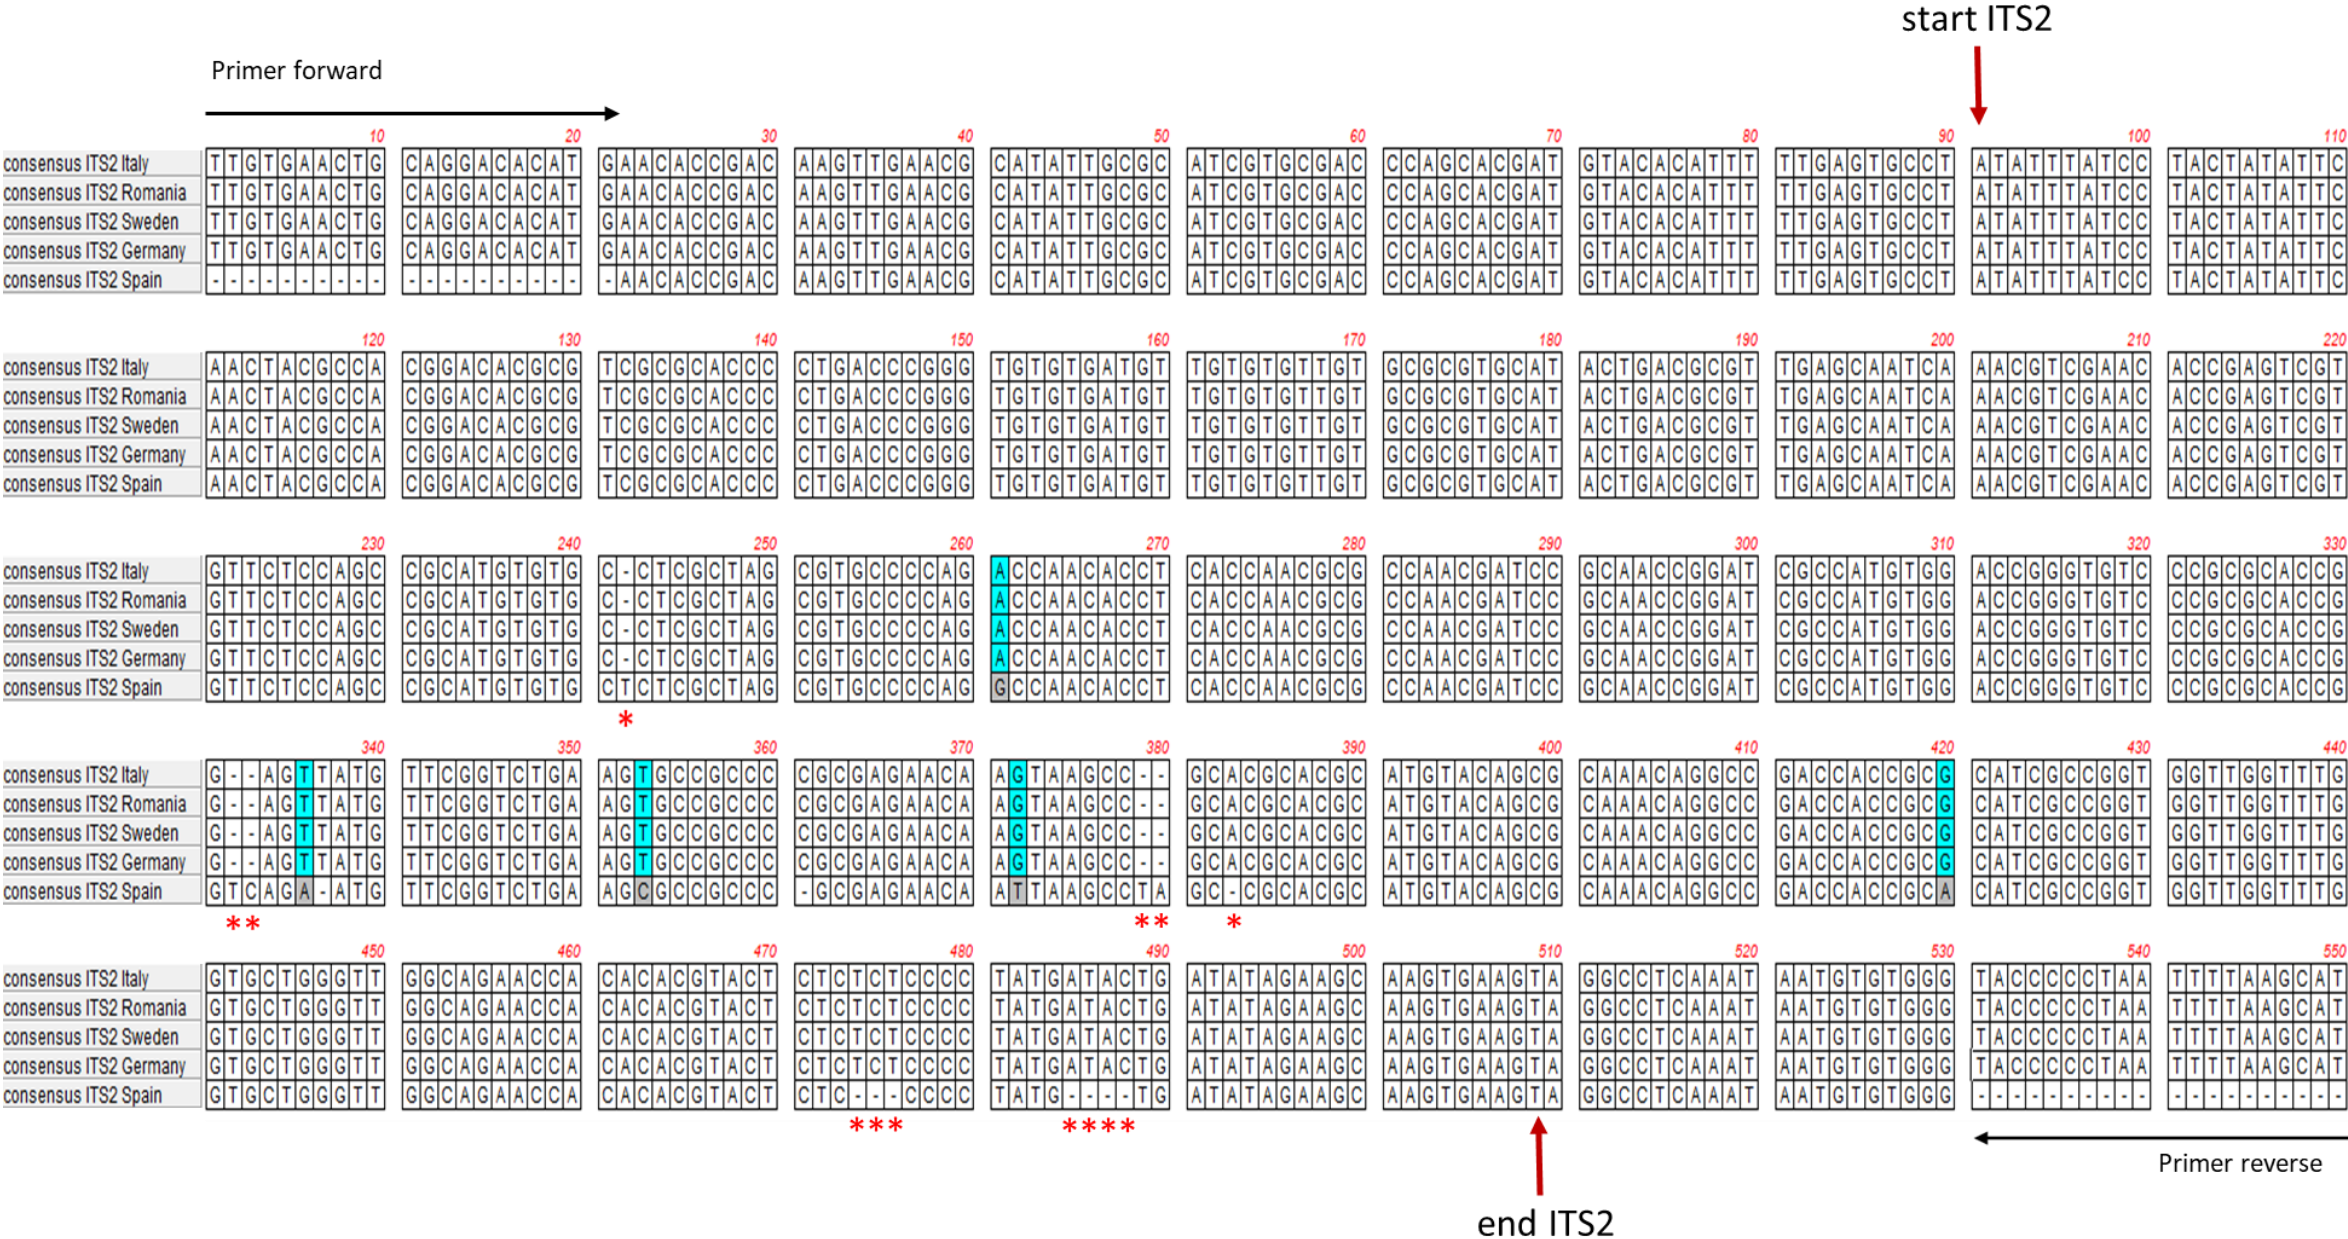

Supplement: s1 [file s1]
