# Supplementary material for: Molecular Characterization of Anopheles algeriensis Theobald, 1903 (Diptera: Culicidae) Populations from Europe
Source: Pathogens. 2022 Aug 30;11(9):990. doi: 10.3390/pathogens11090990 (PMC9505642; doi:10.3390/pathogens11090990)
Supplement: Supplementary file 1 [file pathogens-11-00990-s001.zip]

Archive with 7 entries (7 files):
- Figure S1.pdf
- Figure S2.pdf
- File S1.pdf
- Table S1.pdf
- Table S2.pdf
- Table S3.xlsx
- Table S4.xlsx
