# Supplementary material for: Molecular Characterization of Anopheles algeriensis Theobald, 1903 (Diptera: Culicidae) Populations from Europe
Source: Pathogens. 2022 Aug 30;11(9):990. doi: 10.3390/pathogens11090990 (PMC9505642; doi:10.3390/pathogens11090990)
Supplement: Supplementary file 1 [file pathogens-11-00990-s001.zip › Table S3.xlsx]

## Sheet: list of haplotypes
Table S3. List of COI haplotypes identified in An. algeriensis specimens in the present study.
	Nucleotide position
Haplotype	49	97	151	229	232	235	238	247	346	358	382	391	418	421	430	451	466	493	496	514	529	565	583	634	637	640	664	692	No. specimens	ID GenBank	Collection site
Hap1	A	A	C	G	A	G	T	A	T	C	T	G	T	A	A	A	T	C	A	A	A	A	G	C	C	A	T	C	2	ON849136; ON849142	Apulia: Lesina (Foggia)
Hap2	G	.	.	.	.	.	.	.	.	.	.	.	.	.	.	.	.	.	.	.	G	.	.	.	.	.	.	.	4	ON849122; ON849130; ON849137; ON849143;	Apulia: Lesina (Foggia)
Hap3	.	.	.	.	.	.	.	.	.	.	.	.	.	.	.	.	.	A	.	.	G	.	.	.	.	.	.	.	4	ON849131; ON949134; ON849135; ON849144	Apulia: Lesina (Foggia)
Hap4	G	.	T	A	.	.	.	.	.	T	C	.	C	G	.	G	.	.	.	.	G	.	A	.	.	.	C	.	10	ON849125; ON849133; ON84913; ON849140; ON849141; ON849145; ON849146; ON849148; ON849153; ON849158	Apulia: Lesina (Foggia)
Hap5	G	.	T	A	.	.	.	.	.	T	C	.	C	G	.	G	.	.	.	.	G	.	A	.	T	.	C	.	2	ON849129; ON849149	Apulia: Lesina (Foggia)
Hap6	.	.	.	.	.	.	.	.	.	.	.	.	.	.	.	.	.	.	.	.	.	.	.	.	T	.	.	.	3	ON849150; ; ON849154; ON849155	Apulia: Lesina (Foggia)
Hap7	G	.	.	A	.	.	.	.	.	.	.	.	.	.	.	.	.	.	.	.	.	.	.	.	.	.	.	.	2	ON849147; ; ON849156	Apulia: Lesina (Foggia)
Hap8	G	.	T	A	.	.	.	.	.	T	C	.	C	G	.	G	.	.	.	G	G	.	A	.	.	.	C	.	1	ON849151	Apulia: Lesina (Foggia)
Hap9	.	.	T	A	.	.	.	.	.	T	C	.	C	.	.	G	.	.	.	.	G	.	A	.	.	.	C	.	1	ON849157	Apulia: Lesina (Foggia)
Hap10	.	G	T	A	.	A	.	G	.	T	C	.	C	G	.	G	.	.	.	G	G	.	A	T	T	G	C	.	1	ON849161	Apulia: Manfredonia (Foggia)
Hap11	.	.	T	A	G	A	C	G	.	T	C	A	C	G	.	.	C	.	G	.	G	C	A	.	.	.	C	.	1	ON849164	Apulia: Castellaneta (Taranto)
Hap12	G	.	T	A	.	.	C	.	C	T	C	.	C	G	.	G	.	.	.	.	G	.	A	.	.	.	C	.	3	ON849123; ON849124; ON849152	Apulia: Lesina (Foggia)
Hap13	.	G	T	A	.	.	.	G	.	T	C	A	C	.	.	.	.	.	.	G	G	.	A	T	.	G	C	.	1	ON949126;	Apulia: Lesina (Foggia)
Hap14	.	.	T	A	G	.	.	.	.	T	C	.	C	G	.	.	.	.	.	.	.	.	A	T	.	.	C	.	4	ON849127;ON849138;ON849159; ON849160	Apulia: Lesina (Foggia)
Hap15	.	.	T	A	G	.	C	.	C	T	C	.	C	G	.	.	.	.	.	.	G	.	A	.	.	.	C	.	2	ON849128; ON849132	Apulia: Lesina (Foggia)
Hap16	G	.	T	A	.	.	.	.	G	T	C	.	C	G	G	G	.	.	.	.	G	.	A	.	.	.	C	G	2	ON849162; ON849163	Basilicata: Pisticci; Apulia: Castellaneta
