# Supplementary material for: Molecular Characterization of Anopheles algeriensis Theobald, 1903 (Diptera: Culicidae) Populations from Europe
Source: Pathogens. 2022 Aug 30;11(9):990. doi: 10.3390/pathogens11090990 (PMC9505642; doi:10.3390/pathogens11090990)
Supplement: Supplementary file 1 [file pathogens-11-00990-s001.zip › Table S4.xlsx]

## Sheet: kimura 2p
Table S4. Distance matrices from aligned COI nucleotide sequences by using the Kimura 2-parameter model.
(SW: Sweden; Ro. Romania; Ge: Germany; Sp: Spain; Po:Portugal).
	Italy Hap1 ON849136	Italy Hap2 ON849122	Italy Hap3 ON849131	Italy Hap4 ON849133	Italy Hap6 ON849150	Italy Hap5 ON849129	Italy Hap7 ON849156	Italy Hap8 ON849151	Italy Hap9 ON849157	Italy Hap10 ON849161	Italy Hap11 ON849164	Italy Hap12 ON849124	Italy Hap13 ON849134	Italy Hap14 ON849138	Italy Hap16 ON849162	Italy Hap15 ON849132	SwedenKP942712	SwedenKP942711	RomaniaKT876482	RomaniaKT876467	RomaniaKT876491	RomaniaKU214665	RomaniaKU214666	RomaniaKU214667	RomaniaKU214668	RomaniaKU214669	RomaniaKU214670	RomaniaKU214671	RomaniaKU214672	RomaniaKU214673	RomaniaKU214674	Romania ON854129	RomaniaKU214675	GermanyMG808414	GermanyMG808415	GermanyMG808416	GermanyMG808417	GermanyMG808418	GermanyMG808419	GermanyMG808420	GermanyMG808421	SpainMK402705	SpainMK402706	SpainMK402711	SpainMK402715	SpainMK402731	SpainMK402741	SpainMK402770	SpainMK402795
Italy Hap2 ON849122	0.0019
Italy Hap3 ON849131	0.0039	0.0019
Italy Hap4 ON849133	0.0182	0.0161	0.0182
Italy Hap6 ON849150	0.0019	0.0039	0.0058	0.0204
Italy Hap5 ON849129	0.0204	0.0182	0.0203	0.0019	0.0182
Italy Hap7 ON849156	0.0000	0.0019	0.0039	0.0182	0.0019	0.0204
Italy Hap8 ON849151	0.0204	0.0182	0.0203	0.0019	0.0226	0.0039	0.0204
Italy Hap9 ON849157	0.0161	0.0140	0.0160	0.0019	0.0182	0.0039	0.0161	0.0039
Italy Hap10 ON849161	0.0315	0.0293	0.0314	0.0120	0.0293	0.0099	0.0315	0.0099	0.0140
Italy Hap11 ON849164	0.0314	0.0291	0.0312	0.0160	0.0337	0.0182	0.0314	0.0182	0.0182	0.0203
Italy Hap12 ON849124	0.0248	0.0226	0.0246	0.0059	0.0270	0.0079	0.0248	0.0079	0.0079	0.0182	0.0182
Italy Hap13 ON849134	0.0248	0.0226	0.0246	0.0140	0.0270	0.0161	0.0248	0.0120	0.0120	0.0099	0.0182	0.0204
Italy Hap14 ON849138	0.0161	0.0182	0.0203	0.0059	0.0182	0.0079	0.0161	0.0079	0.0079	0.0140	0.0182	0.0120	0.0120
Italy Hap16 ON849162	0.0225	0.0203	0.0223	0.0039	0.0246	0.0058	0.0225	0.0058	0.0058	0.0160	0.0202	0.0078	0.0182	0.0099
Italy Hap15 ON849132	0.0226	0.0204	0.0225	0.0079	0.0248	0.0099	0.0226	0.0099	0.0099	0.0204	0.0160	0.0019	0.0182	0.0099	0.0099
SwedenKP942712	0.0039	0.0019	0.0039	0.0140	0.0059	0.0161	0.0039	0.0161	0.0120	0.0270	0.0314	0.0204	0.0248	0.0204	0.0182	0.0226
SwedenKP942711	0.0019	0.0000	0.0019	0.0161	0.0039	0.0182	0.0019	0.0182	0.0140	0.0293	0.0291	0.0226	0.0226	0.0182	0.0203	0.0204	0.0019
RomaniaKT876482	0.0315	0.0293	0.0314	0.0161	0.0293	0.0140	0.0315	0.0140	0.0182	0.0079	0.0203	0.0226	0.0140	0.0182	0.0203	0.0248	0.0270	0.0293
RomaniaKT876467	0.0078	0.0058	0.0039	0.0140	0.0099	0.0160	0.0078	0.0160	0.0119	0.0269	0.0312	0.0203	0.0246	0.0203	0.0181	0.0225	0.0039	0.0058	0.0269
RomaniaKT876491	0.0000	0.0019	0.0039	0.0182	0.0019	0.0204	0.0000	0.0204	0.0161	0.0315	0.0314	0.0248	0.0248	0.0161	0.0225	0.0226	0.0039	0.0019	0.0315	0.0078
RomaniaKU214665	0.0039	0.0019	0.0039	0.0182	0.0059	0.0204	0.0039	0.0204	0.0161	0.0315	0.0314	0.0248	0.0248	0.0204	0.0225	0.0226	0.0039	0.0019	0.0315	0.0078	0.0039
RomaniaKU214666	0.0039	0.0019	0.0039	0.0182	0.0059	0.0204	0.0039	0.0204	0.0161	0.0315	0.0314	0.0248	0.0248	0.0204	0.0225	0.0226	0.0039	0.0019	0.0315	0.0078	0.0039	0.0000
RomaniaKU214667	0.0039	0.0019	0.0039	0.0182	0.0059	0.0204	0.0039	0.0204	0.0161	0.0315	0.0314	0.0248	0.0248	0.0204	0.0225	0.0226	0.0039	0.0019	0.0315	0.0078	0.0039	0.0000	0.0000
RomaniaKU214668	0.0039	0.0019	0.0039	0.0182	0.0059	0.0204	0.0039	0.0204	0.0161	0.0315	0.0314	0.0248	0.0248	0.0204	0.0225	0.0226	0.0039	0.0019	0.0315	0.0078	0.0039	0.0000	0.0000	0.0000
RomaniaKU214669	0.0039	0.0019	0.0039	0.0182	0.0059	0.0204	0.0039	0.0204	0.0161	0.0315	0.0314	0.0248	0.0248	0.0204	0.0225	0.0226	0.0039	0.0019	0.0315	0.0078	0.0039	0.0000	0.0000	0.0000	0.0000
RomaniaKU214670	0.0059	0.0039	0.0058	0.0204	0.0079	0.0226	0.0059	0.0226	0.0182	0.0339	0.0337	0.0270	0.0270	0.0226	0.0246	0.0248	0.0059	0.0039	0.0339	0.0099	0.0059	0.0019	0.0019	0.0019	0.0019	0.0019
RomaniaKU214671	0.0315	0.0293	0.0314	0.0161	0.0293	0.0140	0.0315	0.0140	0.0182	0.0079	0.0203	0.0226	0.0140	0.0182	0.0203	0.0248	0.0270	0.0293	0.0000	0.0269	0.0315	0.0315	0.0315	0.0315	0.0315	0.0315	0.0339
RomaniaKU214672	0.0315	0.0293	0.0314	0.0161	0.0293	0.0140	0.0315	0.0140	0.0182	0.0079	0.0203	0.0226	0.0140	0.0182	0.0203	0.0248	0.0270	0.0293	0.0000	0.0269	0.0315	0.0315	0.0315	0.0315	0.0315	0.0315	0.0339	0.0000
RomaniaKU214673	0.0670	0.0696	0.0720	0.0724	0.0643	0.0696	0.0670	0.0751	0.0696	0.0724	0.0782	0.0807	0.0751	0.0643	0.0775	0.0779	0.0724	0.0696	0.0724	0.0720	0.0670	0.0724	0.0724	0.0724	0.0724	0.0724	0.0751	0.0724	0.0724
RomaniaKU214674	0.0670	0.0696	0.0720	0.0724	0.0643	0.0696	0.0670	0.0751	0.0696	0.0724	0.0782	0.0807	0.0751	0.0643	0.0775	0.0779	0.0724	0.0696	0.0724	0.0720	0.0670	0.0724	0.0724	0.0724	0.0724	0.0724	0.0751	0.0724	0.0724	0.0000
Romania ON854129	0.0643	0.0670	0.0694	0.0696	0.0670	0.0724	0.0643	0.0724	0.0670	0.0751	0.0754	0.0779	0.0724	0.0670	0.0748	0.0751	0.0696	0.0670	0.0807	0.0694	0.0643	0.0696	0.0696	0.0696	0.0696	0.0696	0.0724	0.0807	0.0807	0.0059	0.0059
RomaniaKU214675	0.0315	0.0293	0.0314	0.0161	0.0293	0.0140	0.0315	0.0140	0.0182	0.0079	0.0203	0.0226	0.0140	0.0182	0.0203	0.0248	0.0270	0.0293	0.0000	0.0269	0.0315	0.0315	0.0315	0.0315	0.0315	0.0315	0.0339	0.0000	0.0000	0.0724	0.0724	0.0807
GermanyMG808414	0.0019	0.0000	0.0019	0.0161	0.0039	0.0182	0.0019	0.0182	0.0140	0.0293	0.0291	0.0226	0.0226	0.0182	0.0203	0.0204	0.0019	0.0000	0.0293	0.0058	0.0019	0.0019	0.0019	0.0019	0.0019	0.0019	0.0039	0.0293	0.0293	0.0696	0.0696	0.0670	0.0293
GermanyMG808415	0.0019	0.0000	0.0019	0.0161	0.0039	0.0182	0.0019	0.0182	0.0140	0.0293	0.0291	0.0226	0.0226	0.0182	0.0203	0.0204	0.0019	0.0000	0.0293	0.0058	0.0019	0.0019	0.0019	0.0019	0.0019	0.0019	0.0039	0.0293	0.0293	0.0696	0.0696	0.0670	0.0293	0.0000
GermanyMG808416	0.0059	0.0039	0.0058	0.0161	0.0039	0.0140	0.0059	0.0182	0.0140	0.0248	0.0291	0.0226	0.0226	0.0182	0.0203	0.0204	0.0059	0.0039	0.0293	0.0099	0.0059	0.0059	0.0059	0.0059	0.0059	0.0059	0.0079	0.0293	0.0293	0.0696	0.0696	0.0724	0.0293	0.0039	0.0039
GermanyMG808417	0.0059	0.0039	0.0058	0.0204	0.0079	0.0226	0.0059	0.0226	0.0182	0.0339	0.0291	0.0270	0.0226	0.0226	0.0246	0.0248	0.0059	0.0039	0.0293	0.0099	0.0059	0.0059	0.0059	0.0059	0.0059	0.0059	0.0079	0.0293	0.0293	0.0751	0.0751	0.0724	0.0293	0.0039	0.0039	0.0079
GermanyMG808418	0.0039	0.0019	0.0039	0.0140	0.0059	0.0161	0.0039	0.0161	0.0120	0.0270	0.0269	0.0204	0.0204	0.0161	0.0182	0.0182	0.0039	0.0019	0.0315	0.0078	0.0039	0.0039	0.0039	0.0039	0.0039	0.0039	0.0059	0.0315	0.0315	0.0724	0.0724	0.0696	0.0315	0.0019	0.0019	0.0019	0.0059
GermanyMG808419	0.0079	0.0059	0.0078	0.0182	0.0099	0.0204	0.0079	0.0204	0.0161	0.0315	0.0269	0.0204	0.0248	0.0204	0.0225	0.0182	0.0079	0.0059	0.0315	0.0119	0.0079	0.0079	0.0079	0.0079	0.0079	0.0079	0.0099	0.0315	0.0315	0.0724	0.0724	0.0696	0.0315	0.0059	0.0059	0.0099	0.0099	0.0079
GermanyMG808420	0.0039	0.0019	0.0039	0.0182	0.0059	0.0204	0.0039	0.0204	0.0161	0.0315	0.0269	0.0248	0.0204	0.0204	0.0225	0.0226	0.0039	0.0019	0.0270	0.0078	0.0039	0.0039	0.0039	0.0039	0.0039	0.0039	0.0059	0.0270	0.0270	0.0724	0.0724	0.0696	0.0270	0.0019	0.0019	0.0059	0.0019	0.0039	0.0079
GermanyMG808421	0.0019	0.0000	0.0019	0.0161	0.0039	0.0182	0.0019	0.0182	0.0140	0.0293	0.0291	0.0226	0.0226	0.0182	0.0203	0.0204	0.0019	0.0000	0.0293	0.0058	0.0019	0.0019	0.0019	0.0019	0.0019	0.0019	0.0039	0.0293	0.0293	0.0696	0.0696	0.0670	0.0293	0.0000	0.0000	0.0039	0.0039	0.0019	0.0059	0.0019
SpainMK402705	0.0762	0.0790	0.0815	0.0734	0.0734	0.0706	0.0762	0.0762	0.0706	0.0734	0.0815	0.0762	0.0790	0.0762	0.0786	0.0790	0.0762	0.0790	0.0819	0.0758	0.0762	0.0819	0.0819	0.0819	0.0819	0.0819	0.0848	0.0819	0.0819	0.0691	0.0691	0.0665	0.0819	0.0790	0.0790	0.0734	0.0819	0.0762	0.0706	0.0790	0.0790
SpainMK402706	0.0706	0.0734	0.0758	0.0679	0.0679	0.0652	0.0706	0.0706	0.0652	0.0679	0.0758	0.0706	0.0734	0.0706	0.0730	0.0734	0.0706	0.0734	0.0762	0.0703	0.0706	0.0762	0.0762	0.0762	0.0762	0.0762	0.0790	0.0762	0.0762	0.0665	0.0665	0.0638	0.0762	0.0734	0.0734	0.0679	0.0762	0.0706	0.0706	0.0734	0.0734	0.0039
SpainMK402711	0.0730	0.0758	0.0782	0.0730	0.0703	0.0703	0.0730	0.0758	0.0703	0.0730	0.0811	0.0758	0.0786	0.0758	0.0782	0.0786	0.0730	0.0758	0.0786	0.0727	0.0730	0.0786	0.0786	0.0786	0.0786	0.0786	0.0815	0.0786	0.0786	0.0662	0.0662	0.0636	0.0786	0.0758	0.0758	0.0730	0.0786	0.0758	0.0730	0.0758	0.0758	0.0039	0.0039
SpainMK402715	0.0762	0.0790	0.0815	0.0734	0.0734	0.0706	0.0762	0.0762	0.0706	0.0734	0.0815	0.0762	0.0790	0.0762	0.0786	0.0790	0.0762	0.0790	0.0819	0.0758	0.0762	0.0819	0.0819	0.0819	0.0819	0.0819	0.0848	0.0819	0.0819	0.0691	0.0691	0.0665	0.0819	0.0790	0.0790	0.0734	0.0819	0.0762	0.0706	0.0790	0.0790	0.0000	0.0039	0.0039
SpainMK402731	0.0734	0.0762	0.0786	0.0706	0.0706	0.0679	0.0734	0.0734	0.0679	0.0706	0.0786	0.0734	0.0762	0.0734	0.0758	0.0762	0.0734	0.0762	0.0790	0.0730	0.0734	0.0790	0.0790	0.0790	0.0790	0.0790	0.0819	0.0790	0.0790	0.0691	0.0691	0.0665	0.0790	0.0762	0.0762	0.0706	0.0790	0.0734	0.0679	0.0762	0.0762	0.0019	0.0019	0.0058	0.0019
SpainMK402741	0.0734	0.0762	0.0786	0.0706	0.0706	0.0679	0.0734	0.0734	0.0679	0.0706	0.0786	0.0734	0.0762	0.0734	0.0758	0.0762	0.0734	0.0762	0.0790	0.0730	0.0734	0.0790	0.0790	0.0790	0.0790	0.0790	0.0819	0.0790	0.0790	0.0665	0.0665	0.0638	0.0790	0.0762	0.0762	0.0706	0.0790	0.0734	0.0734	0.0762	0.0762	0.0019	0.0019	0.0019	0.0019	0.0039
SpainMK402770	0.0762	0.0790	0.0815	0.0734	0.0734	0.0706	0.0762	0.0762	0.0706	0.0734	0.0815	0.0762	0.0790	0.0762	0.0786	0.0790	0.0762	0.0790	0.0819	0.0758	0.0762	0.0819	0.0819	0.0819	0.0819	0.0819	0.0848	0.0819	0.0819	0.0691	0.0691	0.0665	0.0819	0.0790	0.0790	0.0734	0.0819	0.0762	0.0706	0.0790	0.0790	0.0000	0.0039	0.0039	0.0000	0.0019	0.0019
SpainMK402795	0.0706	0.0734	0.0758	0.0679	0.0679	0.0652	0.0706	0.0706	0.0652	0.0679	0.0758	0.0706	0.0734	0.0706	0.0730	0.0734	0.0706	0.0734	0.0762	0.0703	0.0706	0.0762	0.0762	0.0762	0.0762	0.0762	0.0790	0.0762	0.0762	0.0665	0.0665	0.0638	0.0762	0.0734	0.0734	0.0679	0.0762	0.0706	0.0706	0.0734	0.0734	0.0039	0.0000	0.0039	0.0039	0.0019	0.0019	0.0039
SpainMK402812	0.0762	0.0790	0.0815	0.0734	0.0734	0.0706	0.0762	0.0762	0.0706	0.0734	0.0815	0.0762	0.0790	0.0762	0.0786	0.0790	0.0762	0.0790	0.0819	0.0758	0.0762	0.0819	0.0819	0.0819	0.0819	0.0819	0.0848	0.0819	0.0819	0.0691	0.0691	0.0665	0.0819	0.0790	0.0790	0.0734	0.0819	0.0762	0.0706	0.0790	0.0790	0.0000	0.0039	0.0039	0.0000	0.0019	0.0019	0.0000	0.0039
SpainMK402833	0.0762	0.0790	0.0815	0.0734	0.0734	0.0706	0.0762	0.0762	0.0706	0.0734	0.0815	0.0762	0.0790	0.0762	0.0786	0.0790	0.0762	0.0790	0.0819	0.0758	0.0762	0.0819	0.0819	0.0819	0.0819	0.0819	0.0848	0.0819	0.0819	0.0691	0.0691	0.0665	0.0819	0.0790	0.0790	0.0734	0.0819	0.0762	0.0706	0.0790	0.0790	0.0000	0.0039	0.0039	0.0000	0.0019	0.0019	0.0000	0.0039
SpainMK402842	0.0762	0.0790	0.0815	0.0734	0.0734	0.0706	0.0762	0.0762	0.0706	0.0734	0.0815	0.0762	0.0790	0.0762	0.0786	0.0790	0.0762	0.0790	0.0819	0.0758	0.0762	0.0819	0.0819	0.0819	0.0819	0.0819	0.0848	0.0819	0.0819	0.0691	0.0691	0.0665	0.0819	0.0790	0.0790	0.0734	0.0819	0.0762	0.0706	0.0790	0.0790	0.0000	0.0039	0.0039	0.0000	0.0019	0.0019	0.0000	0.0039
SpainMK402857	0.0730	0.0758	0.0782	0.0730	0.0703	0.0703	0.0730	0.0758	0.0703	0.0730	0.0811	0.0758	0.0786	0.0758	0.0782	0.0786	0.0730	0.0758	0.0786	0.0727	0.0730	0.0786	0.0786	0.0786	0.0786	0.0786	0.0815	0.0786	0.0786	0.0662	0.0662	0.0636	0.0786	0.0758	0.0758	0.0730	0.0786	0.0758	0.0730	0.0758	0.0758	0.0039	0.0039	0.0000	0.0039	0.0058	0.0019	0.0039	0.0039
SpainMK402859	0.0706	0.0734	0.0758	0.0679	0.0679	0.0652	0.0706	0.0706	0.0652	0.0679	0.0758	0.0706	0.0734	0.0706	0.0730	0.0734	0.0706	0.0734	0.0762	0.0703	0.0706	0.0762	0.0762	0.0762	0.0762	0.0762	0.0790	0.0762	0.0762	0.0665	0.0665	0.0638	0.0762	0.0734	0.0734	0.0679	0.0762	0.0706	0.0706	0.0734	0.0734	0.0039	0.0000	0.0039	0.0039	0.0019	0.0019	0.0039	0.0000
SpainMK402867	0.0762	0.0790	0.0815	0.0734	0.0734	0.0706	0.0762	0.0762	0.0706	0.0734	0.0815	0.0762	0.0790	0.0762	0.0786	0.0790	0.0762	0.0790	0.0819	0.0758	0.0762	0.0819	0.0819	0.0819	0.0819	0.0819	0.0848	0.0819	0.0819	0.0691	0.0691	0.0665	0.0819	0.0790	0.0790	0.0734	0.0819	0.0762	0.0706	0.0790	0.0790	0.0000	0.0039	0.0039	0.0000	0.0019	0.0019	0.0000	0.0039
SpainMH348260	0.0762	0.0790	0.0815	0.0734	0.0734	0.0706	0.0762	0.0762	0.0706	0.0734	0.0815	0.0762	0.0790	0.0762	0.0786	0.0790	0.0762	0.0790	0.0819	0.0758	0.0762	0.0819	0.0819	0.0819	0.0819	0.0819	0.0848	0.0819	0.0819	0.0691	0.0691	0.0665	0.0819	0.0790	0.0790	0.0734	0.0819	0.0762	0.0762	0.0790	0.0790	0.0039	0.0039	0.0039	0.0039	0.0059	0.0019	0.0039	0.0039
SpainMH370024	0.0762	0.0790	0.0815	0.0734	0.0734	0.0706	0.0762	0.0762	0.0706	0.0734	0.0815	0.0762	0.0790	0.0762	0.0786	0.0790	0.0762	0.0790	0.0819	0.0758	0.0762	0.0819	0.0819	0.0819	0.0819	0.0819	0.0848	0.0819	0.0819	0.0691	0.0691	0.0665	0.0819	0.0790	0.0790	0.0734	0.0819	0.0762	0.0706	0.0790	0.0790	0.0000	0.0039	0.0039	0.0000	0.0019	0.0019	0.0000	0.0039
SpainMH370026	0.0706	0.0734	0.0758	0.0679	0.0679	0.0652	0.0706	0.0706	0.0652	0.0679	0.0758	0.0706	0.0734	0.0706	0.0730	0.0734	0.0706	0.0734	0.0762	0.0703	0.0706	0.0762	0.0762	0.0762	0.0762	0.0762	0.0790	0.0762	0.0762	0.0665	0.0665	0.0638	0.0762	0.0734	0.0734	0.0679	0.0762	0.0706	0.0706	0.0734	0.0734	0.0039	0.0000	0.0039	0.0039	0.0019	0.0019	0.0039	0.0000
SpainMH370027	0.0734	0.0762	0.0786	0.0706	0.0706	0.0679	0.0734	0.0734	0.0679	0.0706	0.0786	0.0734	0.0762	0.0734	0.0758	0.0762	0.0734	0.0762	0.0790	0.0730	0.0734	0.0790	0.0790	0.0790	0.0790	0.0790	0.0819	0.0790	0.0790	0.0691	0.0691	0.0665	0.0790	0.0762	0.0762	0.0706	0.0790	0.0734	0.0679	0.0762	0.0762	0.0019	0.0019	0.0058	0.0019	0.0000	0.0039	0.0019	0.0019
SpainMT192975	0.0706	0.0734	0.0758	0.0679	0.0679	0.0652	0.0706	0.0706	0.0652	0.0679	0.0815	0.0762	0.0734	0.0706	0.0730	0.0790	0.0706	0.0734	0.0762	0.0703	0.0706	0.0762	0.0762	0.0762	0.0762	0.0762	0.0790	0.0762	0.0762	0.0691	0.0691	0.0665	0.0762	0.0734	0.0734	0.0679	0.0762	0.0706	0.0762	0.0734	0.0734	0.0079	0.0079	0.0078	0.0079	0.0099	0.0059	0.0079	0.0079
SpainMT192980	0.0762	0.0790	0.0815	0.0734	0.0734	0.0706	0.0762	0.0762	0.0706	0.0734	0.0815	0.0762	0.0790	0.0762	0.0786	0.0790	0.0762	0.0790	0.0819	0.0758	0.0762	0.0819	0.0819	0.0819	0.0819	0.0819	0.0848	0.0819	0.0819	0.0691	0.0691	0.0665	0.0819	0.0790	0.0790	0.0734	0.0819	0.0762	0.0706	0.0790	0.0790	0.0000	0.0039	0.0039	0.0000	0.0019	0.0019	0.0000	0.0039
SpainMT192981	0.0730	0.0758	0.0782	0.0730	0.0703	0.0703	0.0730	0.0758	0.0703	0.0730	0.0811	0.0758	0.0786	0.0758	0.0782	0.0786	0.0730	0.0758	0.0786	0.0727	0.0730	0.0786	0.0786	0.0786	0.0786	0.0786	0.0815	0.0786	0.0786	0.0662	0.0662	0.0636	0.0786	0.0758	0.0758	0.0730	0.0786	0.0758	0.0730	0.0758	0.0758	0.0039	0.0039	0.0000	0.0039	0.0058	0.0019	0.0039	0.0039
PortugalMW961330	0.0790	0.0819	0.0844	0.0762	0.0762	0.0734	0.0790	0.0790	0.0734	0.0762	0.0844	0.0790	0.0819	0.0790	0.0758	0.0819	0.0790	0.0819	0.0848	0.0786	0.0790	0.0848	0.0848	0.0848	0.0848	0.0848	0.0878	0.0848	0.0848	0.0718	0.0718	0.0691	0.0848	0.0819	0.0819	0.0762	0.0848	0.0790	0.0734	0.0819	0.0819	0.0019	0.0059	0.0058	0.0019	0.0039	0.0039	0.0019	0.0059
PortugalMW961331	0.0790	0.0819	0.0844	0.0762	0.0762	0.0734	0.0790	0.0790	0.0734	0.0762	0.0844	0.0790	0.0819	0.0790	0.0758	0.0819	0.0790	0.0819	0.0848	0.0786	0.0790	0.0848	0.0848	0.0848	0.0848	0.0848	0.0878	0.0848	0.0848	0.0718	0.0718	0.0691	0.0848	0.0819	0.0819	0.0762	0.0848	0.0790	0.0734	0.0819	0.0819	0.0019	0.0059	0.0058	0.0019	0.0039	0.0039	0.0019	0.0059
PortugalMW961332	0.0706	0.0734	0.0758	0.0679	0.0679	0.0652	0.0706	0.0706	0.0652	0.0734	0.0758	0.0706	0.0790	0.0706	0.0730	0.0734	0.0706	0.0734	0.0762	0.0703	0.0706	0.0762	0.0762	0.0762	0.0762	0.0762	0.0790	0.0762	0.0762	0.0638	0.0638	0.0665	0.0762	0.0734	0.0734	0.0679	0.0762	0.0706	0.0652	0.0734	0.0734	0.0039	0.0079	0.0078	0.0039	0.0059	0.0059	0.0039	0.0079
[truncated: 16 more columns]
